# Supplementary material for: Assembly of a series of zinc coordination polymers based on 5-functionalized isophthalic acids and dipyridyl
Source: Royal Society of Chemistry journal article supplement (doi:10.1039/c7ra12874f), 2018-01-01
Supplement: c7ra12874f1.pdf [file c7ra12874f1.pdf]

**Electronic Supplementary Information (ESI)**

**Assembly of a series of zinc coordination polymers based on 5-functionalized  
Isophthalic Acids and dipyridyl**

Tao Wang,<sup>†</sup> Rong-Rong Zhu,<sup>†</sup> Xiao-Feng Zhang, Tong Yan, Quan Wang, Jing Feng,  
Jie Zhou, Lin Du\* and Qi-Hua Zhao\*

*Key Laboratory of Medicinal Chemistry for Natural Resource Education Ministry, School of  
Chemical Science and Technology · Pharmacy, Yunnan University, Kunming, 650091, PR China*

\* Corresponding author.

*Email address: qhzhao@ynu.edu.cn; lindu@ynu.edu.cn*

**Table S1.** Selected Bond Distances (Å) and Angles (deg) for Complexes **1-8**

---

| Complex 1              |             |                                       |             |
|------------------------|-------------|---------------------------------------|-------------|
| Zn1—O3 <sup>i</sup>    | 1.9475 (17) | O3 <sup>i</sup> —Zn1—O1               | 103.66 (8)  |
| Zn1—O1                 | 1.9554 (18) | O3 <sup>i</sup> —Zn1—N2 <sup>ii</sup> | 134.60 (8)  |
| Zn1—N2 <sup>ii</sup>   | 2.0396 (19) | O1—Zn1—N2 <sup>ii</sup>               | 108.52 (8)  |
| Zn1—N1                 | 2.079 (2)   | O3 <sup>i</sup> —Zn1—N1               | 106.53 (8)  |
| O3—Zn1 <sup>iii</sup>  | 1.9475 (17) | O1—Zn1—N1                             | 98.10 (8)   |
| N2—Zn1 <sup>iv</sup>   | 2.0396 (19) | N2 <sup>ii</sup> —Zn1—N1              | 99.76 (8)   |
| Complex 2              |             |                                       |             |
| Zn1—O1                 | 1.940 (2)   | O1—Zn1—O3 <sup>i</sup>                | 103.93 (9)  |
| Zn1—O3 <sup>i</sup>    | 1.9519 (18) | O1—Zn1—N2 <sup>ii</sup>               | 133.05 (9)  |
| Zn1—N2 <sup>ii</sup>   | 2.030 (2)   | O3 <sup>i</sup> —Zn1—N2 <sup>ii</sup> | 109.24 (9)  |
| Zn1—N1                 | 2.077 (2)   | O1—Zn1—N1                             | 107.76 (9)  |
| O3—Zn1 <sup>iii</sup>  | 1.9518 (18) | O3 <sup>i</sup> —Zn1—N1               | 97.15 (9)   |
| N2—Zn1 <sup>iv</sup>   | 2.030 (2)   | N2 <sup>ii</sup> —Zn1—N1              | 100.15 (9)  |
| Complex 3              |             |                                       |             |
| Zn1—O1                 | 1.935 (2)   | O1—Zn1—N1                             | 129.22 (10) |
| Zn1—O3 <sup>i</sup>    | 2.037 (2)   | O3 <sup>i</sup> —Zn1—N1               | 104.61 (10) |
| Zn1—N1                 | 2.067 (3)   | O1—Zn1—N2 <sup>ii</sup>               | 100.96 (10) |
| Zn1—N2 <sup>ii</sup>   | 2.120 (3)   | O3 <sup>i</sup> —Zn1—N2 <sup>ii</sup> | 91.88 (10)  |
| Zn1—O4 <sup>i</sup>    | 2.388 (2)   | N1—Zn1—N2 <sup>ii</sup>               | 93.95 (11)  |
| O4—Zn1 <sup>iii</sup>  | 2.388 (2)   | O1—Zn1—O4 <sup>i</sup>                | 95.82 (9)   |
| O3—Zn1 <sup>iii</sup>  | 2.037 (2)   | O3 <sup>i</sup> —Zn1—O4 <sup>i</sup>  | 58.46 (9)   |
| N2—Zn1 <sup>iv</sup>   | 2.120 (3)   | N1—Zn1—O4 <sup>i</sup>                | 94.14 (10)  |
| O1—Zn1—O3 <sup>i</sup> | 122.84 (10) | N2 <sup>ii</sup> —Zn1—O4 <sup>i</sup> | 150.33 (9)  |
| Complex 4              |             |                                       |             |
| Zn1—N1                 | 2.104 (4)   | N1—Zn1—N1 <sup>i</sup>                | 94.1 (2)    |
| Zn1—N1 <sup>i</sup>    | 2.104 (4)   | N1—Zn1—O2                             | 92.97 (15)  |
| Zn1—O2                 | 2.173 (4)   | N1 <sup>i</sup> —Zn1—O2               | 150.89 (15) |
| Zn1—O2 <sup>i</sup>    | 2.173 (4)   | N1—Zn1—O2 <sup>i</sup>                | 150.89 (15) |
| Zn1—O1                 | 2.192 (4)   | N1 <sup>i</sup> —Zn1—O2 <sup>i</sup>  | 92.97 (15)  |

---

|                         |             |                                       |             |
|-------------------------|-------------|---------------------------------------|-------------|
| Zn1—O1 <sup>i</sup>     | 2.192 (4)   | O2—Zn1—O2 <sup>i</sup>                | 94.5 (2)    |
| N1—Zn1—O1               | 101.89 (16) | N1 <sup>i</sup> —Zn1—O1 <sup>i</sup>  | 101.89 (15) |
| N1 <sup>i</sup> —Zn1—O1 | 91.19 (15)  | O2—Zn1—O1 <sup>i</sup>                | 106.17 (15) |
| O2—Zn1—O1               | 59.71 (14)  | O2 <sup>i</sup> —Zn1—O1 <sup>i</sup>  | 59.71 (14)  |
| O2 <sup>i</sup> —Zn1—O1 | 106.17 (15) | O1—Zn1—O1 <sup>i</sup>                | 160.9 (2)   |
| N1—Zn1—O1 <sup>i</sup>  | 91.19 (15)  |                                       |             |
| <b>Complex 5</b>        |             |                                       |             |
| Zn1—O1                  | 1.979 (3)   | O1—Zn1—O3 <sup>i</sup>                | 102.12 (12) |
| Zn1—O3 <sup>i</sup>     | 1.984 (3)   | O1—Zn1—N2 <sup>ii</sup>               | 108.51 (13) |
| Zn1—N2 <sup>ii</sup>    | 2.030 (3)   | O3 <sup>i</sup> —Zn1—N2 <sup>ii</sup> | 111.52 (13) |
| Zn1—N1                  | 2.043 (3)   | O1—Zn1—N1                             | 106.84 (13) |
| O3—Zn1 <sup>iii</sup>   | 1.984 (3)   | O3 <sup>i</sup> —Zn1—N1               | 104.43 (13) |
| N2—Zn1 <sup>iv</sup>    | 2.030 (3)   | N2 <sup>ii</sup> —Zn1—N1              | 121.63 (14) |
| <b>Complex 6</b>        |             |                                       |             |
| Zn1—O1                  | 1.9264 (19) | O1—Zn1—N1                             | 126.47 (9)  |
| Zn1—O3 <sup>i</sup>     | 1.938 (2)   | O3 <sup>i</sup> —Zn1—N1               | 96.08 (9)   |
| Zn1—N1                  | 2.048 (2)   | O1—Zn1—N2                             | 103.52 (10) |
| Zn1—N2                  | 2.068 (3)   | O3 <sup>i</sup> —Zn1—N2               | 104.93 (10) |
| O3—Zn1 <sup>ii</sup>    | 1.938 (2)   | N1—Zn1—N2                             | 105.37 (10) |
| O1—Zn1—O3 <sup>i</sup>  | 118.42 (9)  |                                       |             |
| <b>Complex 7</b>        |             |                                       |             |
| Zn1—O1                  | 1.978 (2)   | O1—Zn1—N2                             | 107.55 (10) |
| Zn1—O4 <sup>i</sup>     | 1.980 (2)   | O4 <sup>i</sup> —Zn1—N2               | 109.19 (11) |
| Zn1—N2                  | 2.035 (2)   | O1—Zn1—N1                             | 107.61 (10) |
| Zn1—N1                  | 2.037 (2)   | O4 <sup>i</sup> —Zn1—N1               | 106.73 (11) |
| O4—Zn1 <sup>ii</sup>    | 1.980 (2)   | N2—Zn1—N1                             | 121.71 (11) |
| O1—Zn1—O4 <sup>i</sup>  | 102.39 (10) |                                       |             |
| <b>Complex 8</b>        |             |                                       |             |
| Zn1—O3 <sup>i</sup>     | 1.9094 (17) | O3 <sup>i</sup> —Zn1—O1               | 121.25 (8)  |
| Zn1—O1                  | 1.9605 (16) | O3 <sup>i</sup> —Zn1—O2 <sup>ii</sup> | 100.42 (8)  |

|                       |             |                          |            |
|-----------------------|-------------|--------------------------|------------|
| Zn1—O2 <sup>ii</sup>  | 1.9831 (17) | O1—Zn1—O2 <sup>ii</sup>  | 114.99 (7) |
| Zn1—N1                | 2.0458 (19) | O3 <sup>i</sup> —Zn1—N1  | 119.54 (8) |
| O2—Zn1 <sup>ii</sup>  | 1.9831 (17) | O1—Zn1—N1                | 98.95 (8)  |
| O3—Zn1 <sup>iii</sup> | 1.9095 (17) | O2 <sup>ii</sup> —Zn1—N1 | 100.54 (7) |

Symmetry codes, **for 1:** (i)  $x-1/2, -y+3/2, z-1/2$ ; (ii)  $-x-1/2, y+1/2, -z+1/2$ ; (iii)  $x+1/2, -y+3/2, z+1/2$ ; (iv)  $-x-1/2, y-1/2, -z+1/2$ ; **for 2:** (i)  $x+1/2, -y+3/2, z+1/2$ ; (ii)  $-x+1/2, y+1/2, -z+1/2$ ; (iii)  $x-1/2, -y+3/2, z-1/2$ ; (iv)  $-x+1/2, y-1/2, -z+1/2$ ; **for 3:** (i)  $x, -y+1/2, z+1/2$ ; (ii)  $-x+1, y-1/2, -z+1/2$ ; (iii)  $x, -y+1/2, z-1/2$ ; (iv)  $-x+1, y+1/2, -z+1/2$ ; **for 4:** (i)  $-x+1/2, y, -z+1/2$ ; (ii)  $x, -y+1, -z+1$ ; (iii)  $-x+1, y, z$ ; **for 5:** (i)  $x+1, y, z+1$ ; (ii)  $x-1, -y+1/2, z+1/2$ ; (iii)  $x-1, y, z-1$ ; (iv)  $x+1, -y+1/2, z-1/2$ ; **for 6:** (i)  $x-1, y, z$ ; (ii)  $x+1, y, z$ ; (iii)  $-x+1, -y+3, -z+1$ ; (iv)  $-x, -y+1, -z+1$ ; **for 7:** (i)  $x+1, y+1, z$ ; (ii)  $x-1, y-1, z$ ; (iii)  $-x+1, -y+1, -z$ ; (iv)  $-x+3, -y, -z$ ; **for 8:** (i)  $x+1/2, y-1/2, z$ ; (ii)  $-x, y, -z+1/2$ ; (iii)  $x-1/2, y+1/2, z$ ; (iv)  $-x, -y+2, -z$ .

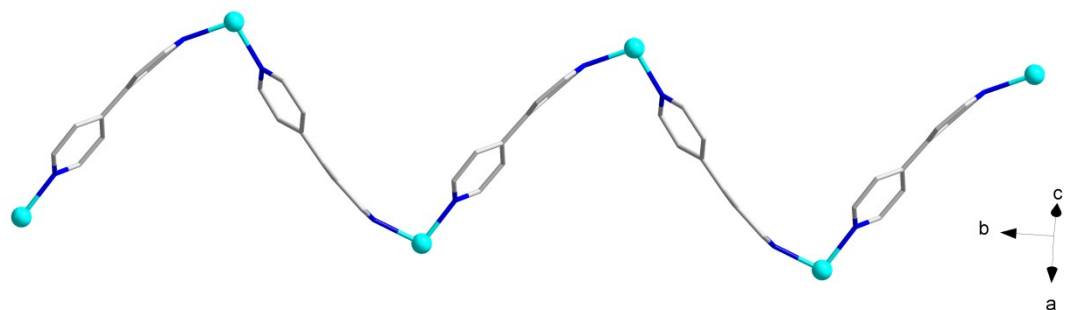

**Fig. S1.** View of the 1D zigzag chains constructed by bpy and Zn(II) in **1** and **2**.

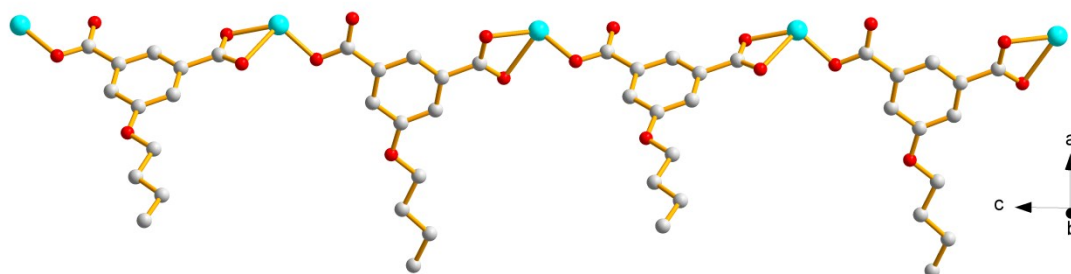

**Fig. S2.** View of the 1-D chain constructed by <sup>n</sup>BuOip and Zn(II) in **3**.

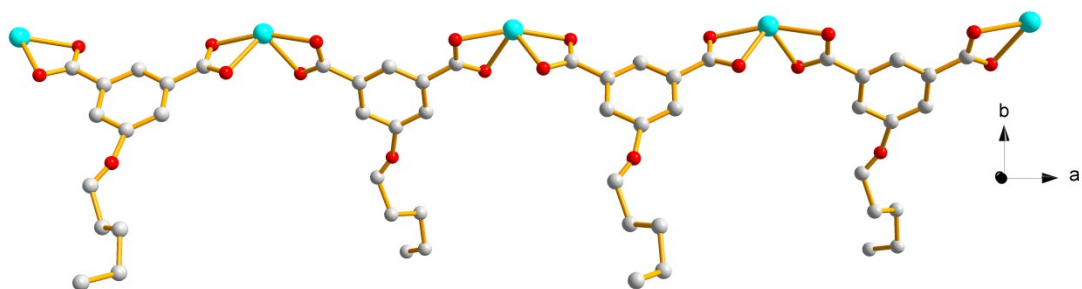

**Fig. S3.** View of the 1-D chain constructed by <sup>n</sup>PeOip and Zn(II) in **4**.

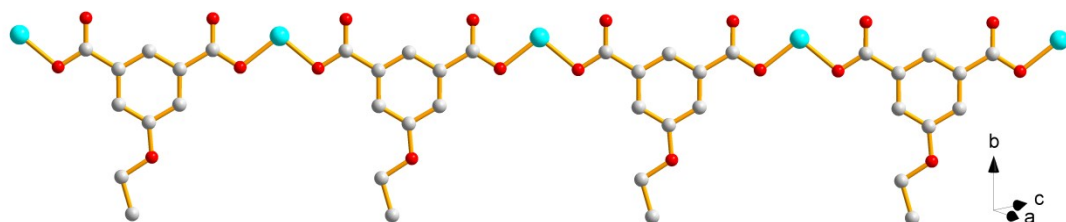

**Fig. S4.** View of the 1-D chain constructed by EtOip and Zn(II) in **5**.

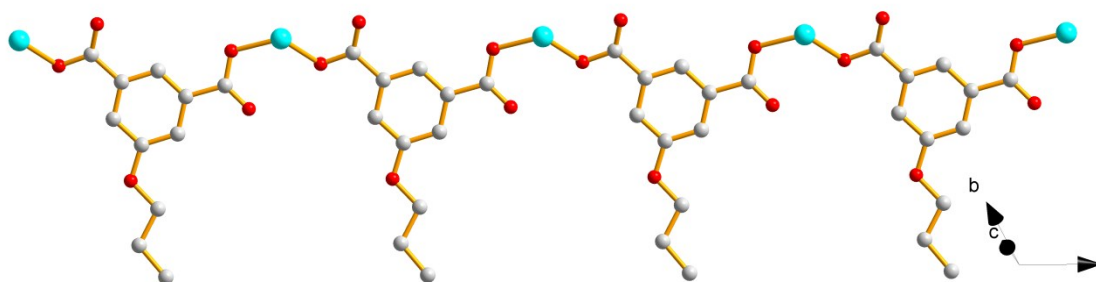

**Fig. S5.** View of the 1-D chain constructed by PrOip and Zn(II) in **6**.

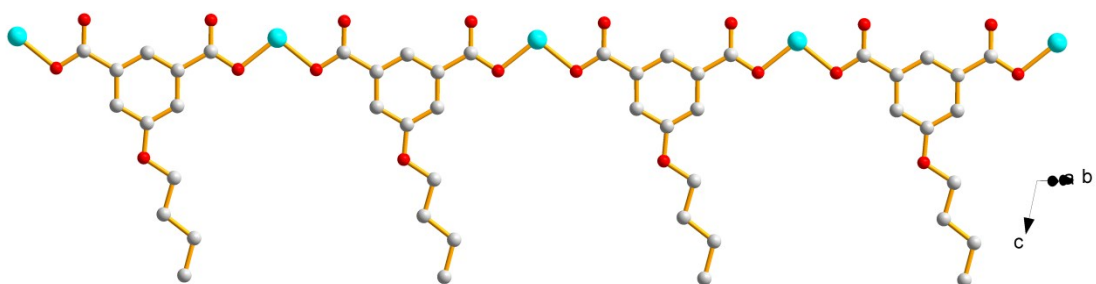

**Fig. S6.** View of the 1-D chain constructed by <sup>n</sup>BuOip and Zn(II) in **7**.

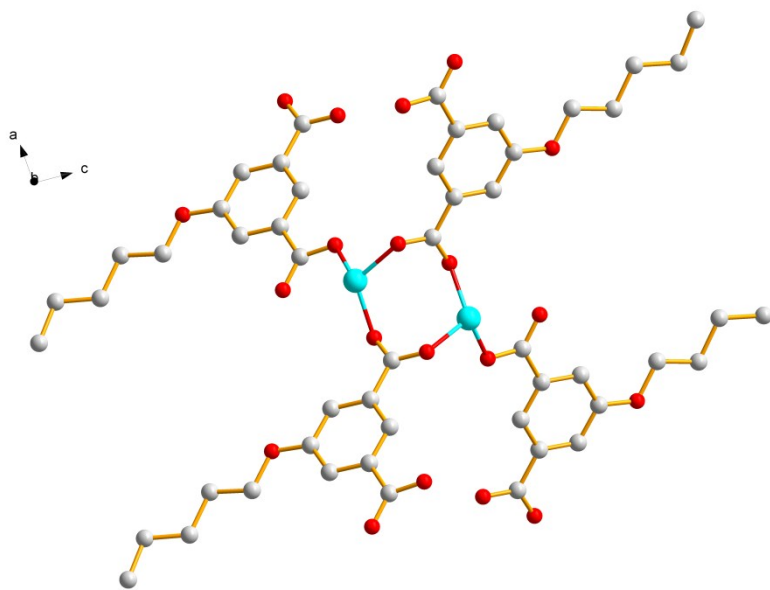

**Fig. S7.** View of a dinuclear  $[Zn_2(nPeOip)_2]$  unit in **8**.

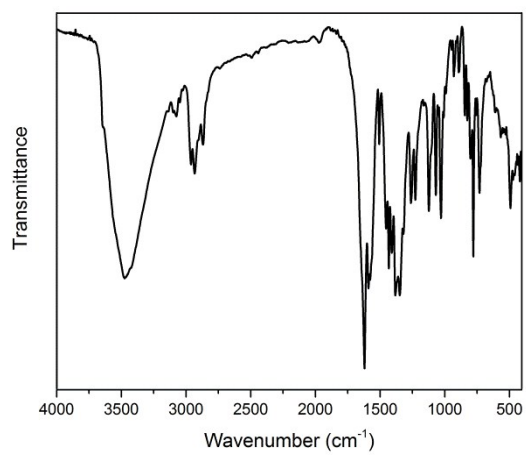

(a)

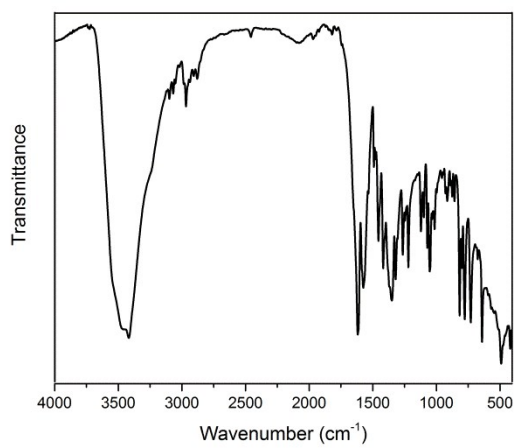

(b)

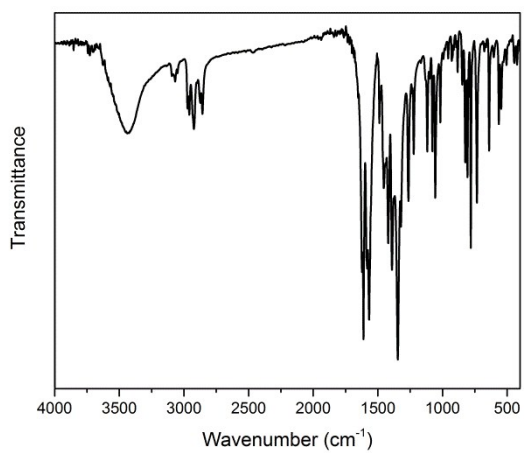

(c)

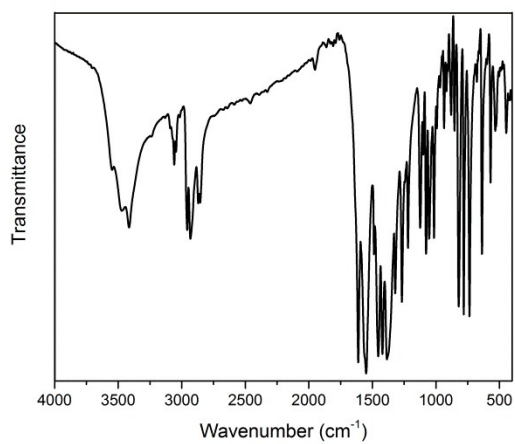

(d)

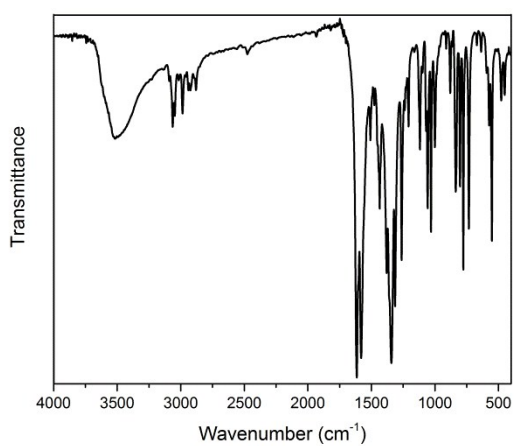

(e)

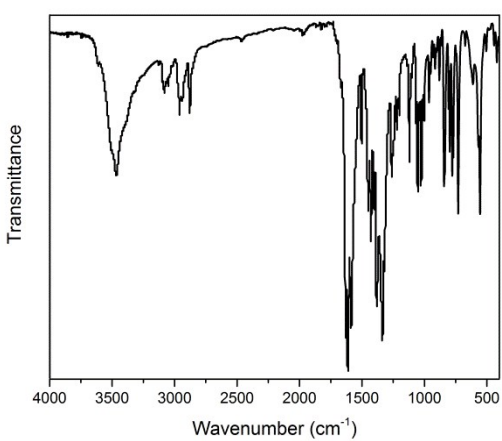

(f)

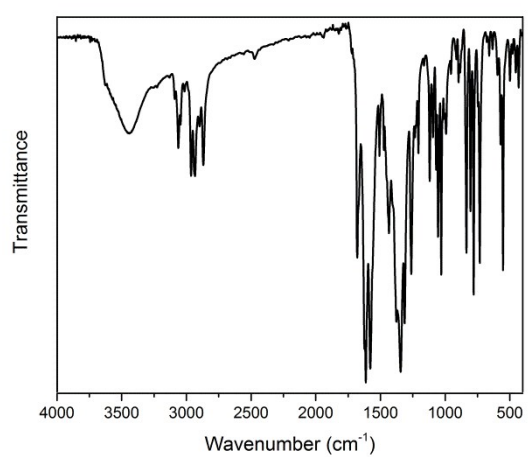

(g)

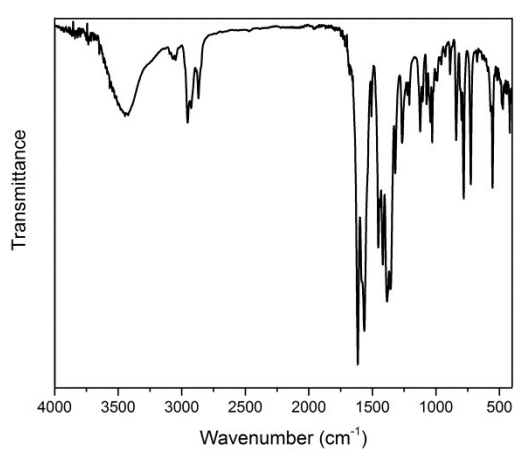

(h)

**Fig. S8.** FT-IR spectrum for **1** (a); **2** (b); **3** (c); **4** (d); **5** (e); **6** (f); **7** (g) and **8** (h).

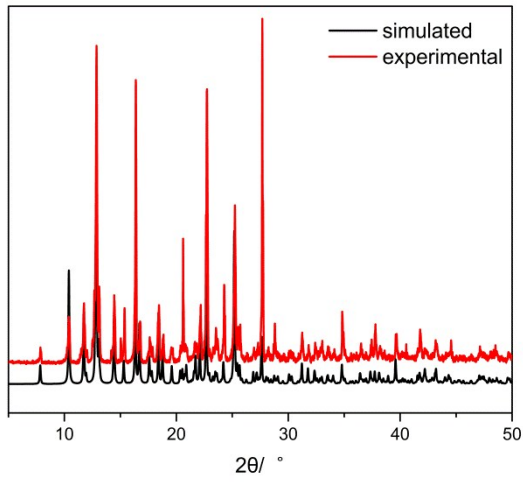

(a)

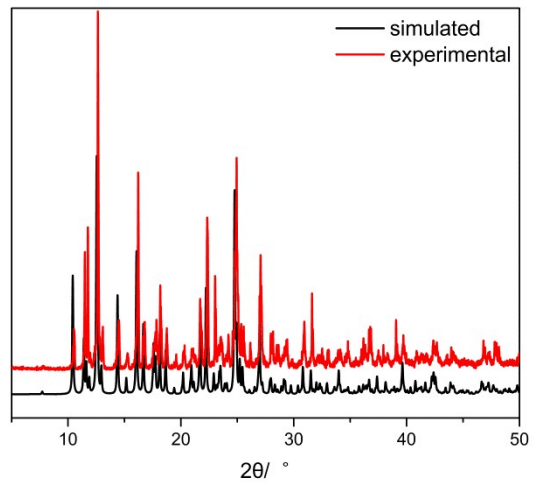

(b)

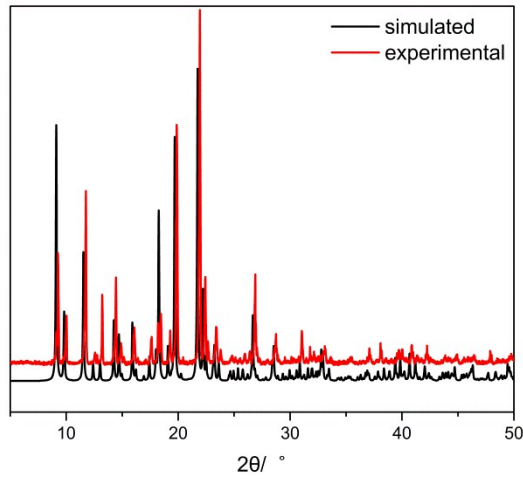

(c)

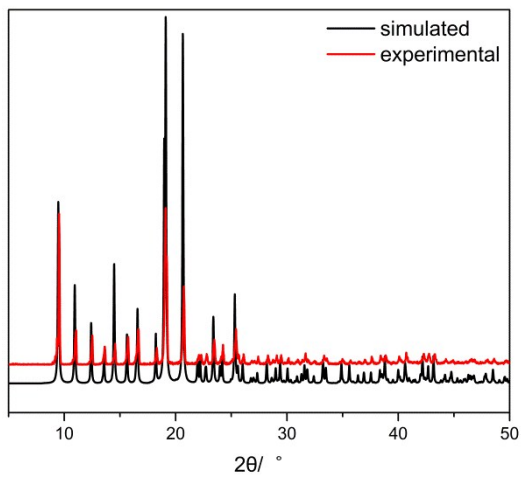

(d)

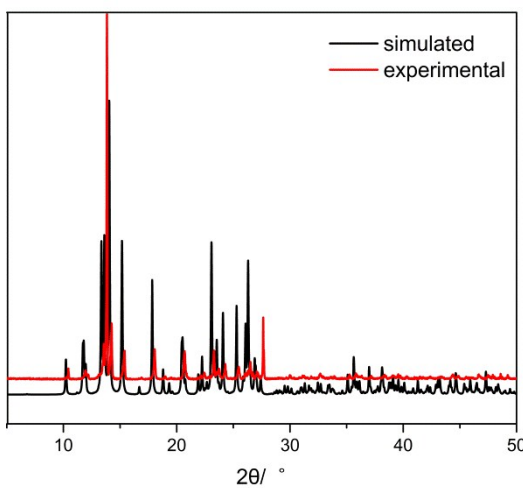

(e)

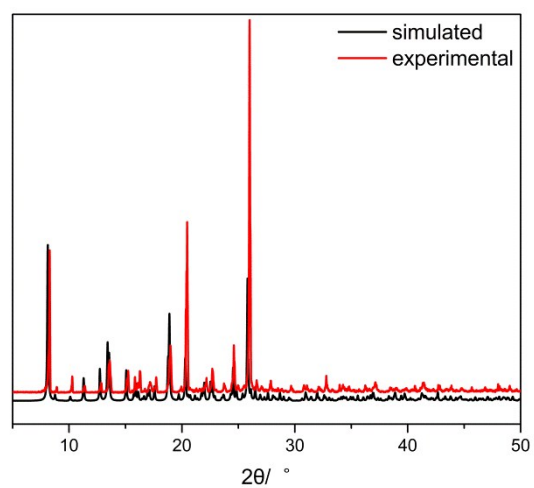

(f)



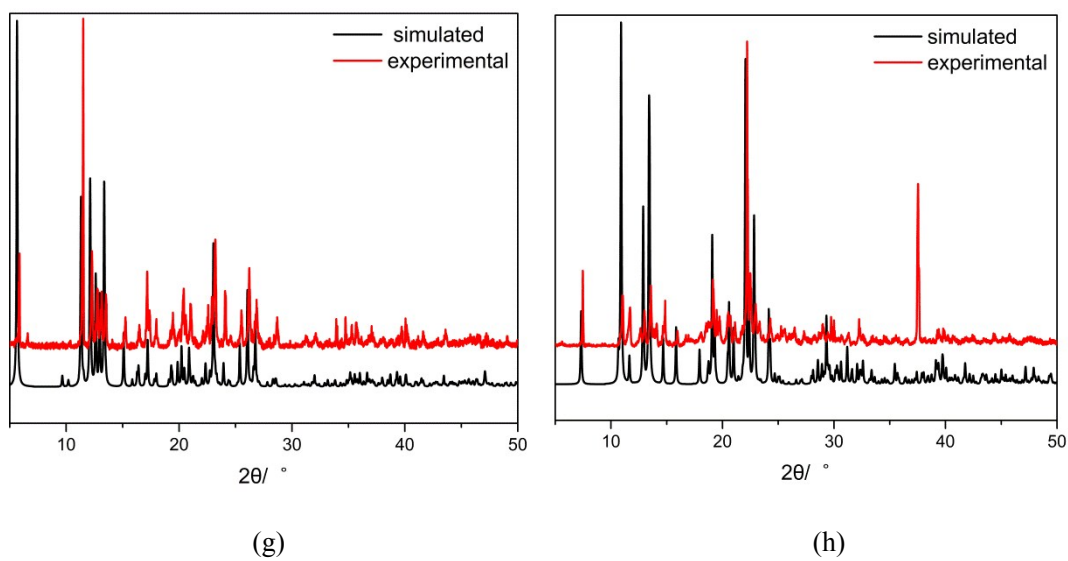

**Fig. S9.** Powder XRD patterns for **1** (a); **2** (b); **3** (c); **4** (d); **5** (e); **6** (f); **7** (g) and **8** (h). Black: simulated from single crystal analysis and experimental; Red: as synthesized.
